# Supplementary material
Source: publisher figshare collection journal article supplement (https://future-science-group.figshare.com/ndownloader/files/28068111)
Supplement: Supplementary file 1 [file 28068111]

**Supplemental Table 1: Timing points based on audio track**

Key:

- Audio
  - *Action in scene*
  - **Activity for nurse**

0.00 = Start

- This is a Virtual Reality Experience …
  - *Dark static scene with instructions*

0.31

- As you can see …
  - *Interviewer approaches desk*

0.56

- You have a few moments…
  - *Prepare thoughts for interview*

1.21

- You’ve heard that the company…
  - *Walking through to interview room*

1.33

- We’ve brought you into this meeting for you to tell us …
  - *Seated for interview*

1.55

- Look I’m sorry, I’m so sorry …
  - *Interview scene ends*

2.01

- - *Maths questions visible to patient*
  - **Serial sevens – see answer schedule below**

2.27

- Next you’ll be walking …
  - *End of maths questions*
  - **Mark down last answer the patient says**

2.35

- *Maths questions fade*
- Beeping of pedestrian light …

2.55

- Shouldn’t those dogs have a muzzle on …

3.20

- Fire station bell …

3.29

- Fire engine siren
  - *Maths questions visible*

3.43

- Second maths question, the nurse will remind you where you left off.

3.48 - **Advise patient of last answer – call out the number that patient last said during first maths question.**

4.13

- You’re late to catch a train
  - *Maths questions end*

5.12

- - *Fades to black*

**Serial sevens answer schedule**

Mark off as patient achieves each

100

93

86

79

72

65

58

51

44

37
